# Supplementary material
Source: MDPI journal article supplement (https://www.mdpi.com/2071-1050/14/17/11103)
Supplement: s1 [file s1 › sustainability-1855369-supplementary.pdf]

**Supplementary Materials**  
**SURVEY QUESTIONNAIRE**

**Section S1**

1. Email Address: \_\_\_\_\_

**Respondent Details: Please fill in details about yourself.**

2. Name of the respondent (optional)? \_\_\_\_\_

3. Age of the respondent? \_\_\_\_\_

4. Gender?

(a) Male [ ]      (b) Female [ ]

5. Industry Experience in Years?

(a) 1-5 [ ]      (b) 6-10 [ ]      (c) 11-15 [ ]      (d) 16-20 [ ]      (e) 21-25 [ ]  
(f) 26-30 [ ]      (g) 31-35 [ ]

6. Your position in the company?

(a) Junior Management [ ]      (b) Middle Management [ ]      (c) Senior Management [ ]  
(d) Owner/Promoter/CEO [ ]      (e) Other [ ] \_\_\_\_\_

7. How long have you been associated with your current company?

(a) Less than 3 Yrs. [ ]      (b) 3 - 6 Yrs. [ ]  
(c) 6 - 12 Yrs. [ ]      (d) more than 12 Yrs. [ ]

8. What is your field of work?

(a) R&D/Product Design and Development [ ]      (b) Purchasing/Supply Chain [ ]  
(c) Production/Manufacturing [ ]      (d) Marketing and Sales [ ]  
(e) Information Technology [ ]      (f) Human Resource Management [ ]  
(g) Finance [ ]      (h) Other [ ] \_\_\_\_\_

**Company Details: Please fill in details about the company you are associated with.**

9. Name of the Company (optional)? \_\_\_\_\_

10. To which region in India, does the company belong?

(a) Eastern [ ]      (b) Western [ ]  
(c) Northern [ ]      (d) Southern [ ]

11. Type of Company?

(a) Automobile [ ]      (b) Electrical and Electronics  
(c) Machinery [ ]      (d) Chemical [ ]  
(e) Process [ ]      (f) Other [ ] \_\_\_\_\_

12. What is your company's annual sales turnover (in Million INR)?

(a) Less than 50 [ ]      (b) 51 to 100 [ ]  
(c) 101 to 500 [ ]      (d) 501 and above [ ]

13. Number of employees in the company?

(a) Less than 50 [ ]      (b) 51 to 100 [ ]  
(c) 101 to 200 [ ]      (d) 201 and above [ ]

14. Please specify your parent company.

(a) Indian [ ]      (b) European [ ]  
(c) Japanese [ ]      (d) USA [ ]

(e) Other [ ] \_\_\_\_\_

## **Section S2**

### **Industry 4.0 Practices (IN) - Rating Scale**

19. How do you rate the importance/agreement/implementation of the following practices of Industry 4.0 Practices in your company?

(1 – Very Low to 5 – Very High)

|     |                                                                            |   |   |   |   |   |
|-----|----------------------------------------------------------------------------|---|---|---|---|---|
| IN1 | Installation of cyber devices to machine/physical components               | 1 | 2 | 3 | 4 | 5 |
| IN2 | Use of advanced robotics to minimize human intervention                    | 1 | 2 | 3 | 4 | 5 |
| IN3 | Smart logistics that reacts to changes in production capacity and demands  | 1 | 2 | 3 | 4 | 5 |
| IN4 | Data collection from machines using big data and cloud computing           | 1 | 2 | 3 | 4 | 5 |
| IN5 | Real-time simulation of collected data                                     | 1 | 2 | 3 | 4 | 5 |
| IN6 | Training of workforce by virtual reality and dynamic simulation techniques | 1 | 2 | 3 | 4 | 5 |
| IN7 | Integration of assets located at individual plants                         | 1 | 2 | 3 | 4 | 5 |
| IN8 | Adoption of flexible and reconfigurable manufacturing systems              | 1 | 2 | 3 | 4 | 5 |

### **Sustainable Operations (SO) - Rating Scale**

21. How do you rate the importance/agreement/implementation of the following practices of Sustainable Operations (SO) in your company?

(1 – Very Low to 5 – Very High)

|     |                                                                            |   |   |   |   |   |
|-----|----------------------------------------------------------------------------|---|---|---|---|---|
| SO1 | Use of renewable materials in product design and manufacturing             | 1 | 2 | 3 | 4 | 5 |
| SO2 | Modification of production processes to reduce the use of energy and water | 1 | 2 | 3 | 4 | 5 |
| SO3 | Enhancement of product life by design changes                              | 1 | 2 | 3 | 4 | 5 |
| SO4 | Measuring of the carbon footprint of the company                           | 1 | 2 | 3 | 4 | 5 |
| SO5 | Use of optimal and efficient logistic transportations                      | 1 | 2 | 3 | 4 | 5 |
| SO6 | Minimization of waste production across the supply chain                   | 1 | 2 | 3 | 4 | 5 |
| SO7 | Remanufacturing and recycling of returned products/goods                   | 1 | 2 | 3 | 4 | 5 |
| SO8 | Reduction in the emission of solid, liquid and vapour by products/wastes   | 1 | 2 | 3 | 4 | 5 |

### **Operational Excellence (OE) - Rating Scale**

How do you rate the level of achievement of **Operational Excellence (OE)** by implementation/adoption of the practices of Industry 4.0 and Sustainable Operations in your company?

(1 – Very Low to 5 – Very High)

|     |                                                  |   |   |   |   |   |
|-----|--------------------------------------------------|---|---|---|---|---|
| OE1 | Improve Process management                       | 1 | 2 | 3 | 4 | 5 |
| OE2 | Increase in the flexibility of operations        | 1 | 2 | 3 | 4 | 5 |
| OE3 | Timely delivery of customer's goods and services | 1 | 2 | 3 | 4 | 5 |
| OE4 | Increase in proficiency and company profits      | 1 | 2 | 3 | 4 | 5 |
| OE5 | Better performance management                    | 1 | 2 | 3 | 4 | 5 |
